# Supplementary material
Source: PubMed Central journal article supplement (PMC6820043)
Supplement: jamainternmed-179-1678-s001.pdf [file jamainternmed-179-1678-s001.pdf]

## Supplementary Online Content

Wheeler M, de Bourmont S, Paul-Emile K, et al. Physician and trainee experiences with patient bias. *JAMA Intern Med*. Published online October 28, 2019.  
doi:10.1001/jamainternmed.2019.4122

**eMethods.** Focus Group Interview Guide

**eTable.** Participant Characteristics (N = 50)

This supplementary material has been provided by the authors to give readers additional information about their work.

## **eMethods. Focus Group Interview Guide**

We are interested in hearing about your experiences with patients who have demeaned you or others on your team based on social characteristics—race/ethnicity, gender, religion, national origin, sexual orientation, body characteristics etc. We are interested in what happened, what you felt and what you wished might have happened.

We hope to use your experiences to understand the range and types of issues confronting students/residents/physicians and staff. We hope that these experiences might inform policies and “best practices” of how to respond to patients who demean medical providers due to race, gender or other social characteristics.

1. Please describe a situation during your clinical rotations that stands out in your mind as an instance when a patient directly belittled you or another member of your team based upon social characteristics—race/ethnicity, religion, sexual orientation, national origin, body characteristics, etc.
2. Did you or any of the other members of your team attempt to address the patient’s behavior? If so, how?
3. If someone attempted to intervene, was the intervention effective? What worked and what could have been done better?
4. If you were alone when this occurred, did you discuss the experience with anyone on the team later? Why or why not?
5. If you did discuss the incident with the team, what happened? Were any actions taken? If so, what was done? What was helpful? What could have been done better?
6. Do you feel that this or other instances of patients demeaning you or other healthcare professionals based on their social characteristics during your clinical rotations affected your professional development? If so, how?
7. Can you think of any interventions that would have improved the situation and/or the effect it had on you?

| <b>eTable. Participant Characteristics (N = 50)</b> |          |          |
|-----------------------------------------------------|----------|----------|
| <b>Physician/Trainee Status</b>                     | <b>N</b> | <b>%</b> |
| Hospitalist                                         | 11       | 22       |
| Resident (R1)                                       | 4        | 8        |
| Resident (R2)                                       | 12       | 24       |
| Resident (R3)                                       | 10       | 20       |
| Medical Student (MS3)                               | 2        | 4        |
| Medical Student (MS4)                               | 11       | 22       |
| <b>Gender Identification</b>                        |          |          |
| Man                                                 | 22       | 44       |
| Woman                                               | 26       | 52       |
| Gender nonconforming                                | 2        | 4        |
| <b>Race/Ethnicity</b>                               |          |          |
| White                                               | 26       | 52       |
| Hispanic/Latinx                                     | 8        | 16       |
| Asian                                               | 7        | 14       |
| Black                                               | 5        | 10       |
| South Asian                                         | 3        | 6        |
| Middle Eastern                                      | 1        | 2        |
